# Supplementary material for: Green solution synthesis of Bi19S27I3 nanostructures – engineering their morphology through polyethylene glycol and their use in the photocatalytic reduction of Cr(vi)
Source: Royal Society of Chemistry journal article supplement (doi:10.1039/d4tc01480d), 2024-01-01
Supplement: d4tc01480d1.pdf [file d4tc01480d1.pdf]

## SUPPORTING INFORMATION

### Green solution synthesis of $\text{Bi}_{19}\text{S}_{27}\text{I}_3$ nanoparticles - engineering morphology through polyethylene glycol and photocatalytic activity of $\text{Cr}^{6+}$

Maia Mombrú Frutos, Martina Viera, Carolina Grosso, Mauricio Rodríguez Chialanza, Laura Fornaro, María Eugenia Pérez Barthaburu, Ivana Aguiar

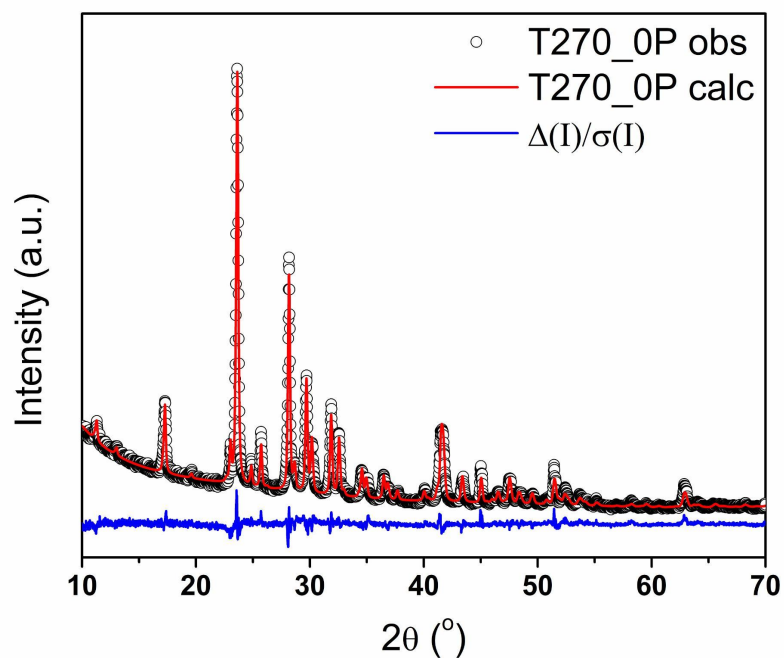

| Parameter   | Value    |
|-------------|----------|
| $R_w$ (%)   | 7.940    |
| chi2        | 14654.4  |
| GoF         | 1.65     |
| a           | 15.66103 |
| c           | 4.0236   |
| Space Group | P63      |

Figure S1. Rietveld refinement of sample T270\_P0 using GSAS-II software. Annex table summarizes the refinement parameters and the unit cell values.

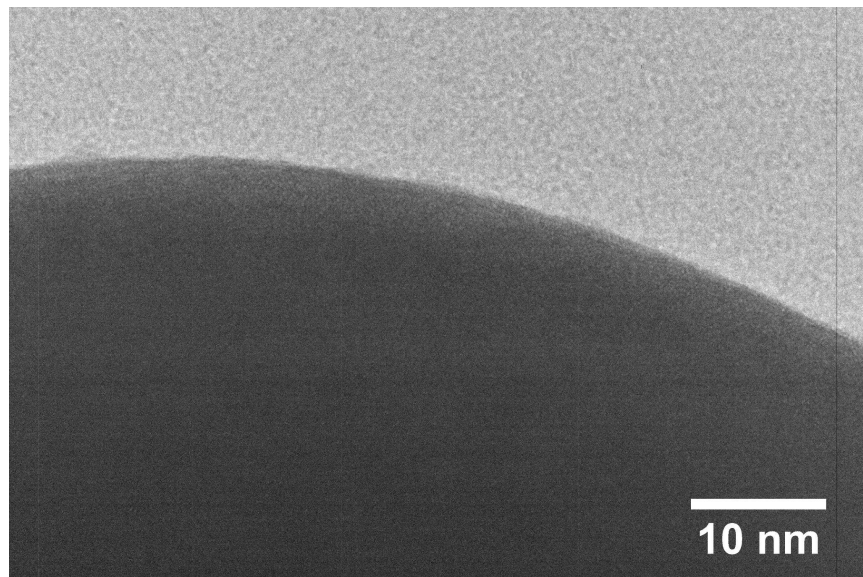

Figure S2. TEM image of edge of round nanoparticle of Bi19S27I3.

Table S1. Median and sigma values of measurements of nanostructures sizes:

|        |            |        | Nanorolls |       |         | Round nanoparticles |       |         |
|--------|------------|--------|-----------|-------|---------|---------------------|-------|---------|
| Sample | time (min) | PEG:Bi | Median    | Sigma | % error | Median              | Sigma | % error |
| T5_I   | 5          | -      | 173       | 35    | 21      | 368                 | 113   | 31      |
| T270_I | 270        | -      | 186       | 38    | 20      | N/A                 | N/A   | N/A     |

|             |            |              |     |    |    |     |     |     |
|-------------|------------|--------------|-----|----|----|-----|-----|-----|
| T5_I_0.5P   | 5          | <b>0.5:1</b> | 147 | 34 | 23 | 414 | 123 | 30  |
| T5_I_1P     | 5          | <b>1:1</b>   | 103 | 23 | 21 | 300 | 76  | 24  |
| T5_I_2P     | <b>5</b>   | 2:1          | 180 | 42 | 24 | 485 | 159 | 34  |
| T270_I_0.5P | <b>270</b> | <b>0.5:1</b> | 119 | 24 | 20 | N/A | N/A | N/A |
| T270_I_1P   | <b>270</b> | <b>1:1</b>   | 148 | 30 | 21 | N/A | N/A | N/A |
| T270_I_2P   | <b>270</b> | 2:1          | 130 | 36 | 28 | 242 | 130 | 54  |

The distribution function used to fit all histograms is LogNormal.

Table S2. Histograms and corresponding LogNormal fitted function for all samples measurements of nanorolls and round nanoparticles:

| Sample  | Histogram nanorolls                                                                 | Nanorolls median (sigma) | Histogram round nanoparticles                                                       |
|---------|-------------------------------------------------------------------------------------|--------------------------|-------------------------------------------------------------------------------------|
| T5_0P   | 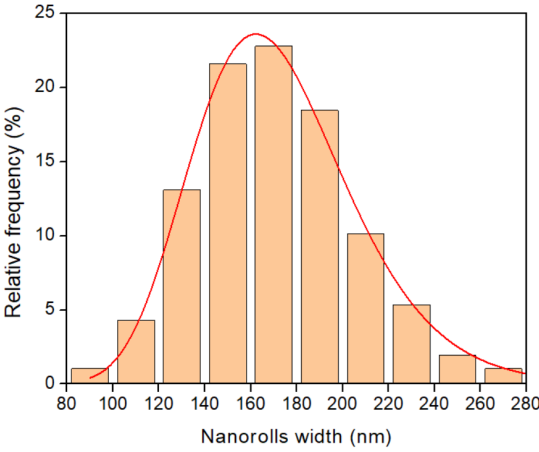  | 173 (35)                 |  |
| T270_0P |  | 186 (38)                 |                                                                                     |

T5\_0.5P

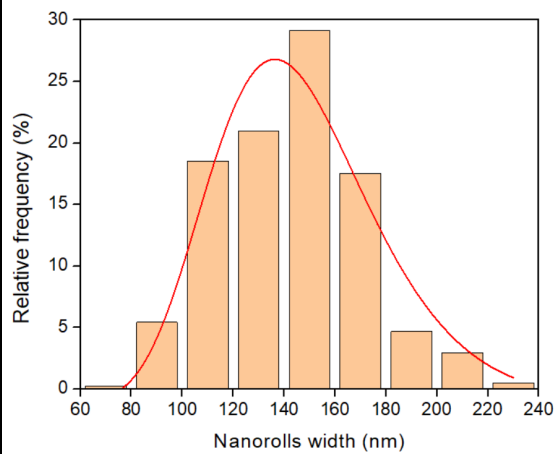

147 (34)

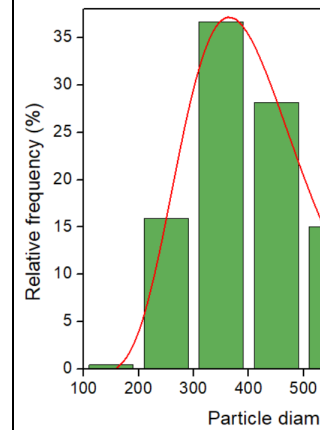

T5\_1P

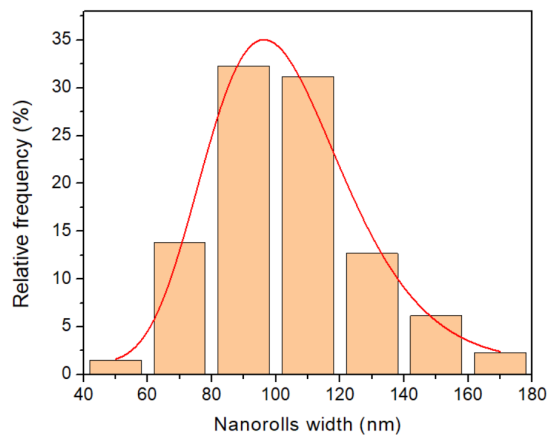

104 (23)

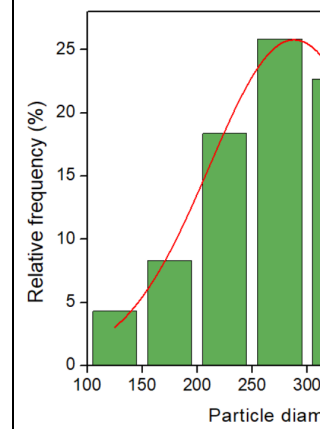

T5\_2P

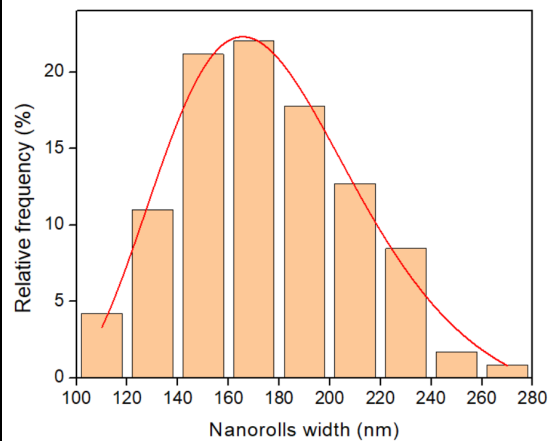

180 (42)

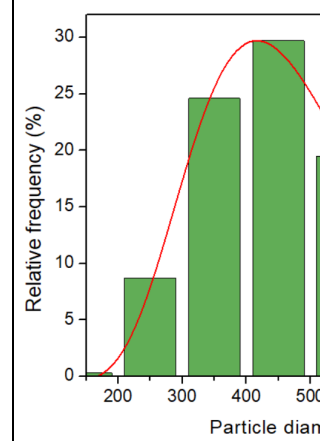

T270\_0.5P

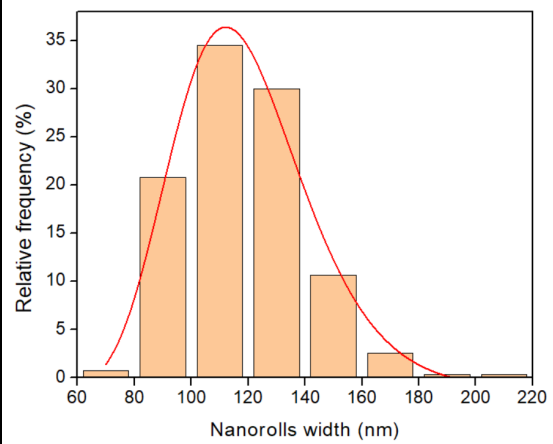

119 (24)

T270\_I\_1P

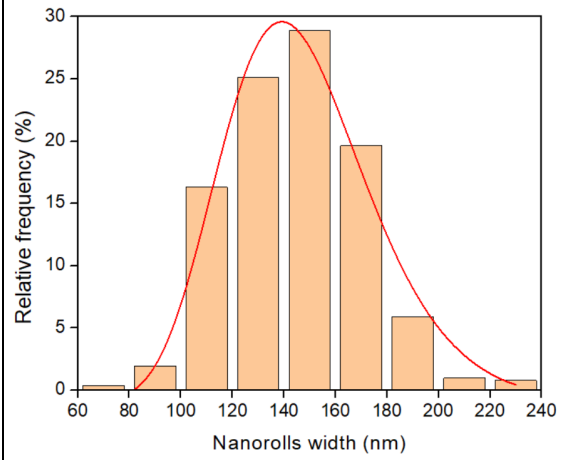

148 (30)

T270\_I\_2P

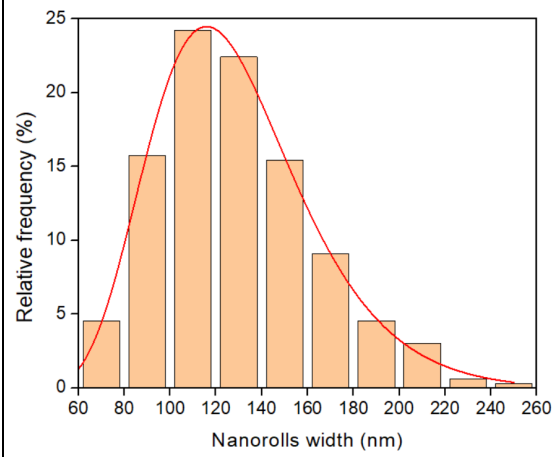

130 (36)

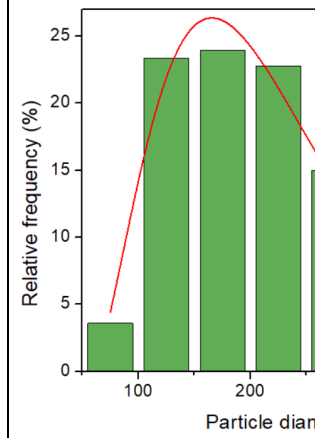

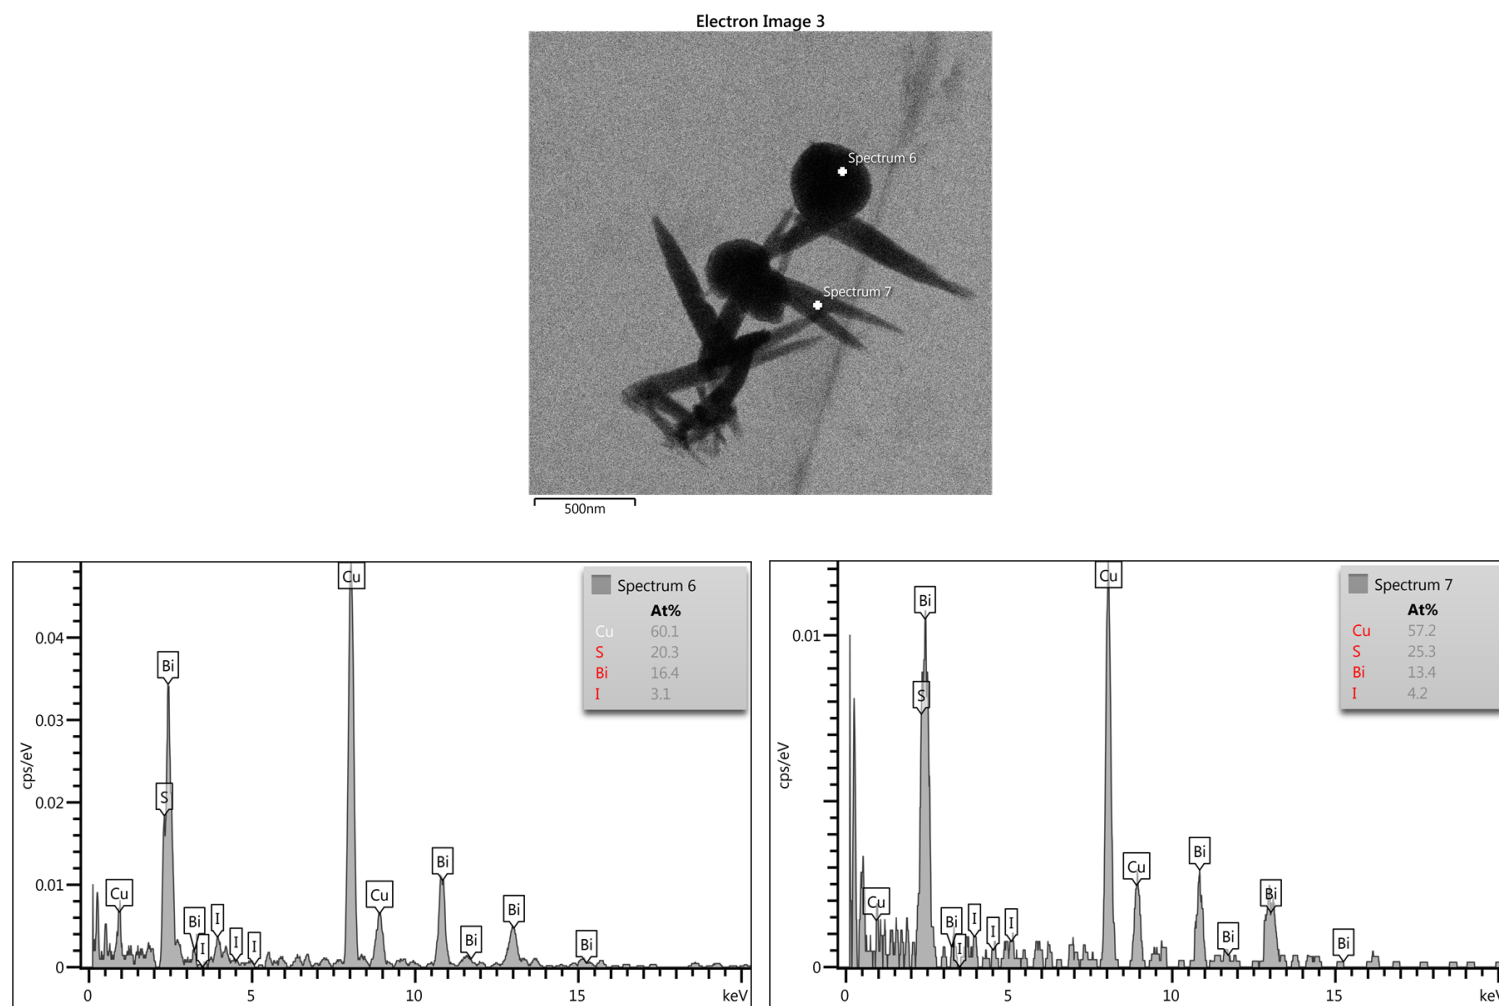

Figure S3. STEM image of nanorolls and nanoparticles and EDS spectra of selected points (Spectrum 6 for round nanoparticle, Spectrum 7 for nanoroll).



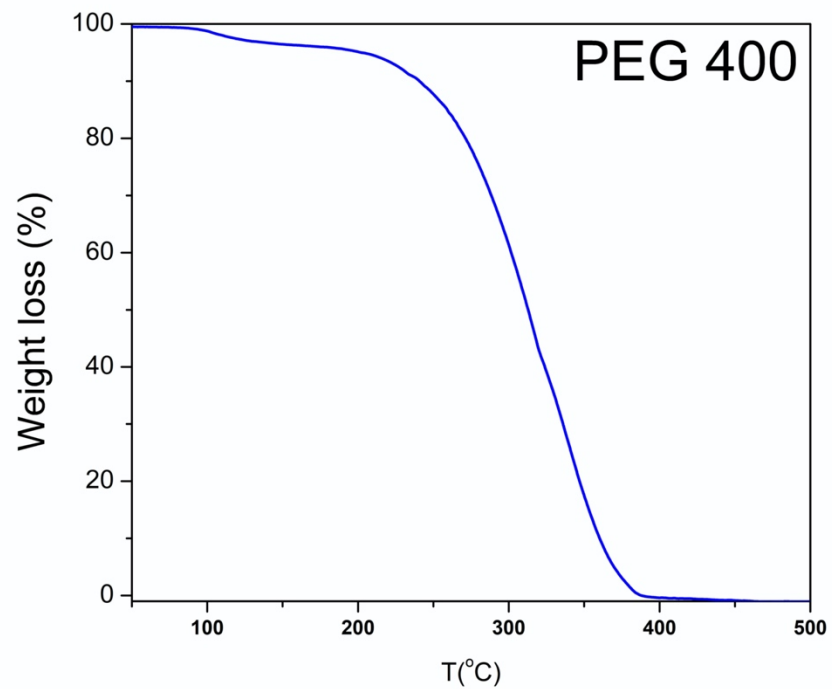

Figure S4. TGA of PEG 400 used in the syntheses of  $\text{Bi}_{19}\text{S}_{27}\text{I}_3$ .
